# Supplementary material for: Vertically aligned VS2 on graphene as a 3D heteroarchitectured anode material with capacitance-dominated lithium storage
Source: Royal Society of Chemistry journal article supplement (doi:10.1039/c9ta13835h), 2020-01-01
Supplement: c9ta13835h1.pdf [file c9ta13835h1.pdf]

***Supplementary Information for***

**Vertically-Aligned VS<sub>2</sub> on Graphene as 3D Heteroarchitected  
Anode Materials with Capacitance-Dominated Lithium Storage**

**Zhiyong Huang,<sup>‡a</sup> Xiaoyan Han,<sup>‡a</sup> Xun Cui,<sup>bc</sup> Chengen He,<sup>ac</sup> Jinlong Zhang,<sup>c</sup>  
Xianggang Wang,<sup>c</sup> Zhiqun Lin,<sup>\*b</sup> and Yingkui Yang<sup>\*ac</sup>**

*<sup>a</sup> Key Laboratory of Catalysis and Energy Materials Chemistry of Ministry of Education & Hubei Key Laboratory of Catalysis and Materials Science, School of Chemistry and Materials Science, South-Central University for Nationalities, Wuhan 430074, China*

*E-mail: [ykyang@mail.scuec.edu.cn](mailto:ykyang@mail.scuec.edu.cn)*

*<sup>b</sup> School of Materials Science and Engineering, Georgia Institute of Technology, Atlanta, GA 30332, USA*

*E-mail: [zhiqun.lin@mse.gatech.edu](mailto:zhiqun.lin@mse.gatech.edu)*

*<sup>c</sup> Graphene R&D Centre, Guangdong Xigu Tanyuan New Materials Corporation Limited & South-Central University for Nationalities, Foshan 528000, China*

*<sup>‡</sup> These two authors equally contribute to this work.*

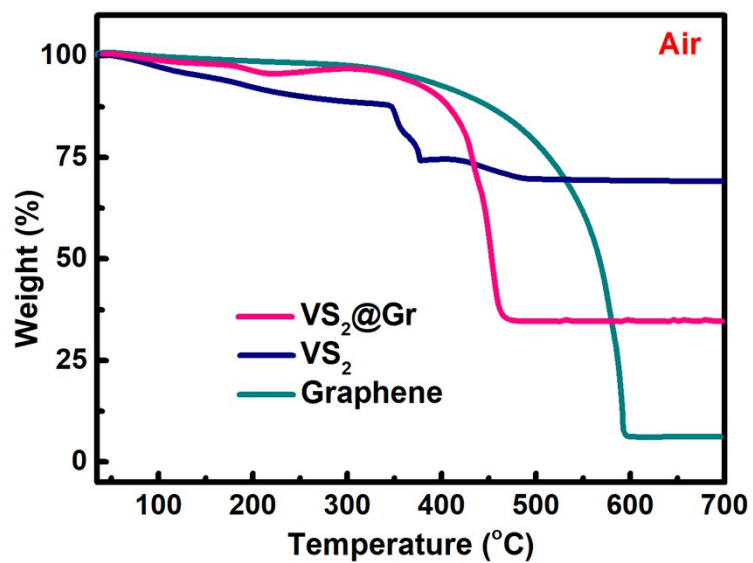

**Fig. S1** TGA curves of VS<sub>2</sub>, graphene, and VS<sub>2</sub>@Gr under an Air atmosphere.

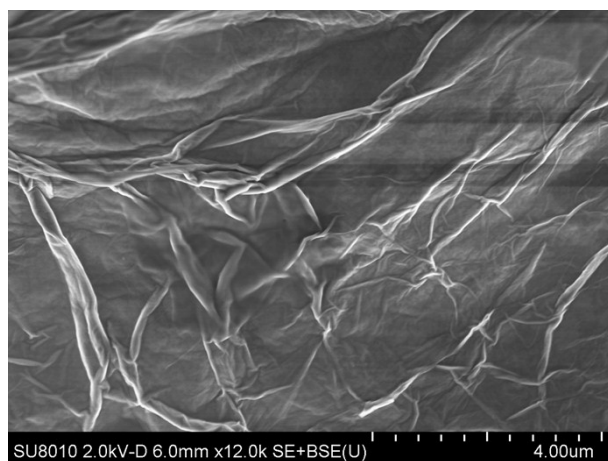

**Fig. S2** Typical SEM image of graphene oxide (GO).

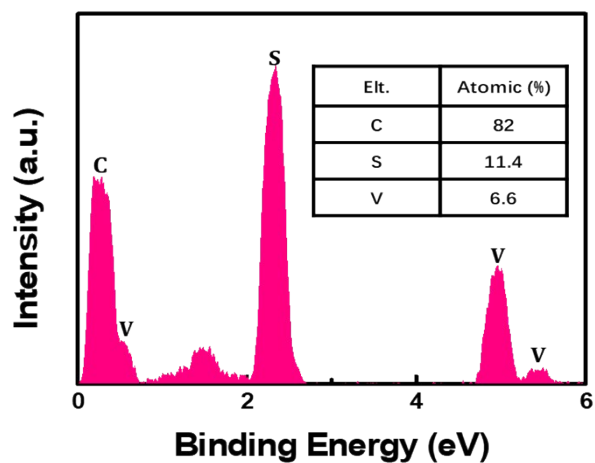

Fig. S3 EDS spectrum of VS<sub>2</sub>@Gr.

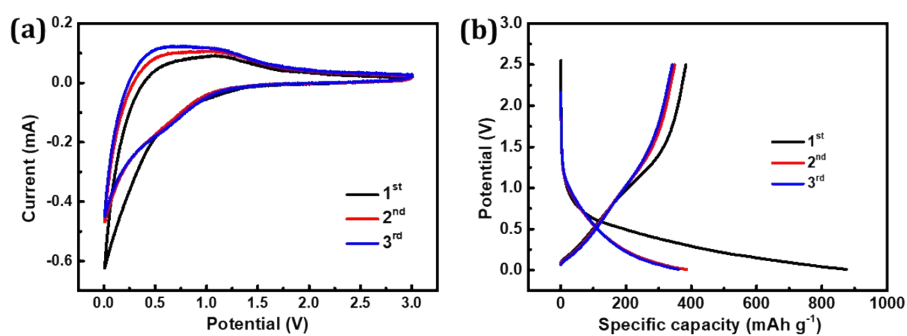

Fig. S4 Electrochemical performance of graphene anode: (a) CV curves at a scan rate of 0.2 mV s<sup>-1</sup>, and (b) charge/discharge curves at 0.1 A g<sup>-1</sup> in the first three cycles.

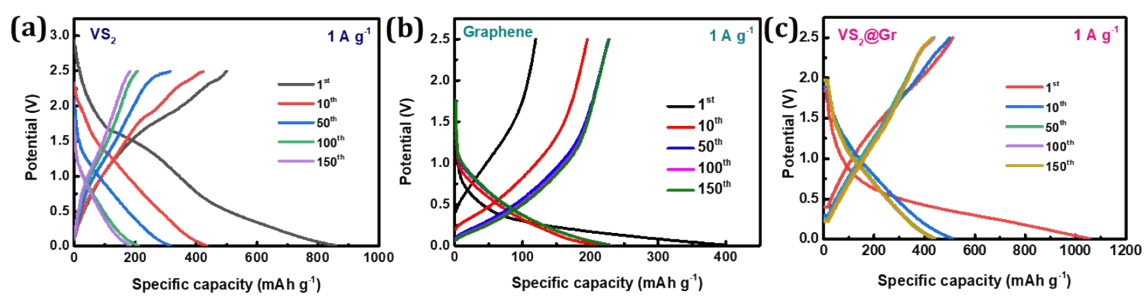

**Fig. S5** Charge/discharge curves of (a)  $\text{VS}_2$ , (b) graphene, and (c)  $\text{VS}_2@\text{Gr}$  at  $1.0 \text{ A g}^{-1}$  for different cycles.

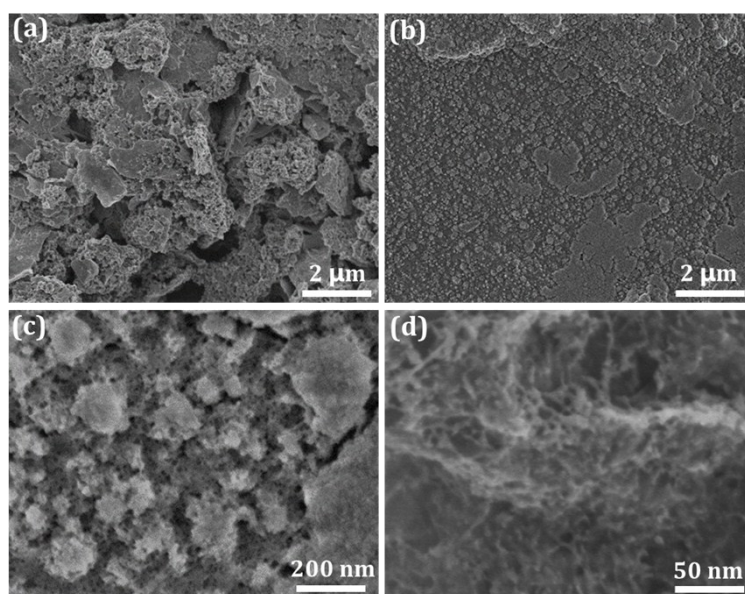

**Fig. S6.** SEM images of the  $\text{VS}_2@\text{Gr}$  electrode slice before (a) and after (b-d) running 150 cycles at  $1 \text{ A g}^{-1}$ .

**Table S1** A survey of lithium storage performance of graphene-containing transition metal dichalcogenide composites

| Materials                                                  | Reversible capacity                                 | Capacity retention                        | Rate capacity                                                                                          | References                                                        |
|------------------------------------------------------------|-----------------------------------------------------|-------------------------------------------|--------------------------------------------------------------------------------------------------------|-------------------------------------------------------------------|
| Vertical MoS <sub>2</sub> nanosheets on graphene           | 1000 mAh g <sup>-1</sup> at 1 A g <sup>-1</sup>     | 1250 mAh g <sup>-1</sup> after 150 cycles | 1385 mAh g <sup>-1</sup> at 0.1 A g <sup>-1</sup><br>970 mAh g <sup>-1</sup> at 5 A g <sup>-1</sup>    | <i>Adv. Energy Mater.</i> , 2017, <b>8</b> 1702254                |
| ReS <sub>2</sub> nanosheets vertically aligned on graphene | 600 mAh g <sup>-1</sup> at 1 A g <sup>-1</sup>      | 343 mAh g <sup>-1</sup> after 500 cycles  | 921 mAh g <sup>-1</sup> at 0.2 A g <sup>-1</sup><br>375 mAh g <sup>-1</sup> at 5 A g <sup>-1</sup>     | <i>J. Mater. Chem. A</i> , 2018, <b>6</b> , 20267–20276           |
| 3D MoS <sub>2</sub> /graphene nanovesicles                 | 815 mAh g <sup>-1</sup> at 0.5 A g <sup>-1</sup>    | 706 mAh g <sup>-1</sup> after 200 cycles  | 964 mAh g <sup>-1</sup> at 0.1 A g <sup>-1</sup><br>739 mAh g <sup>-1</sup> at 1 A g <sup>-1</sup>     | <i>Chem. Eng. J.</i> , 2018, <b>350</b> ,1066–1072                |
| WS <sub>2</sub> /carbon nanotube-graphene                  | 656 mA h g <sup>-1</sup> at 0.2 mAh g <sup>-1</sup> | 572 mAh g <sup>-1</sup> after 100 cycles  | 749 mAh g <sup>-1</sup> at 0.1 A g <sup>-1</sup><br>337 mAh g <sup>-1</sup> at 10 A g <sup>-1</sup>    | <i>Adv. Energy Mater.</i> 2016, 1601057                           |
| MoS <sub>2</sub> nanosheets on graphene                    | 890 mAh g <sup>-1</sup> at 1 A g <sup>-1</sup>      | 900 mAh g <sup>-1</sup> after 400 cycles  | 1035 mAh g <sup>-1</sup> at 0.2 A g <sup>-1</sup><br>890 mAh g <sup>-1</sup> at 1 A g <sup>-1</sup>    | <i>ACS Nano</i> , 2016, <b>10</b> , 8526–8535                     |
| VS <sub>4</sub> particles homogenously wrapped by graphene | 987.5 mAh g <sup>-1</sup> at 0.2 A g <sup>-1</sup>  | 890.8 mAh g <sup>-1</sup> after 80 cycles | 987.5 mAh g <sup>-1</sup> at 0.2 A g <sup>-1</sup><br>479.2 mAh g <sup>-1</sup> at 4 A g <sup>-1</sup> | <i>J. Alloys. Compd.</i> , 2016, <b>685</b> , 294-299             |
| MnS hollow microspheres on graphene                        | 800 mAh g <sup>-1</sup> at 1 A g <sup>-1</sup>      | 640 mAh g <sup>-1</sup> after 400 cycles  | 1050 mAh g <sup>-1</sup> at 0.3 A g <sup>-1</sup><br>580 mAh g <sup>-1</sup> at 2 A g <sup>-1</sup>    | <i>ACS Appl. Mater. Interfaces</i> , 2015, <b>7</b> , 20957–20964 |
| WS <sub>2</sub> nanosheets on graphene                     | 740 mAh g <sup>-1</sup> at 0.1 A g <sup>-1</sup>    | 416 mAh g <sup>-1</sup> after 100 cycles  | 728 mAh g <sup>-1</sup> at 0.1 A g <sup>-1</sup><br>323 mAh g <sup>-1</sup> at 1 A g <sup>-1</sup>     | <i>J. Mater. Chem. A</i> , 2015, <b>3</b> , 24128–24138           |
| MoS <sub>2</sub> nanosheets on N-doped graphene            | 830 mAh g <sup>-1</sup> at 0.5 A g <sup>-1</sup>    | 675 mAh g <sup>-1</sup> after 450 cycles  | 934 mAh g <sup>-1</sup> at 0.1 A g <sup>-1</sup><br>573 mAh g <sup>-1</sup> at 1 A g <sup>-1</sup>     | <i>Electrochim. Acta</i> , 2019, <b>308</b> , 217-226             |
| Hollow MgS nanocrystals on graphene                        | 1050 mAh g <sup>-1</sup> at 5 A g <sup>-1</sup>     | 838 mAh g <sup>-1</sup> after 3000 cycles | 1208 mAh g <sup>-1</sup> at 0.1 A g <sup>-1</sup><br>1000 mAh g <sup>-1</sup> at 1 A g <sup>-1</sup>   | <i>ACS Nano</i> , 2018, <b>12</b> , 12741–12750                   |
| MoS <sub>2</sub> -carbon microflowers on graphene          | 700 mAh g <sup>-1</sup> at 1 A g <sup>-1</sup>      | 600 mAh g <sup>-1</sup> after 300 cycles  | 759 mAh g <sup>-1</sup> at 0.1 A g <sup>-1</sup><br>375 mAh g <sup>-1</sup> at 10 A g <sup>-1</sup>    | <i>Energy Storage Mater.</i> , 2017, <b>9</b> , 195–205           |
| 3D porous MoS <sub>x</sub> /graphene                       | 1214 mAh g <sup>-1</sup> at 0.1 A g <sup>-1</sup>   | 1504 mAh g <sup>-1</sup> after 100 cycles | 1214 mAh g <sup>-1</sup> at 0.1 A g <sup>-1</sup><br>1016 mAh g <sup>-1</sup> at 2 A g <sup>-1</sup>   | <i>Small</i> , 2017, <b>14</b> , 1703096                          |
